# Supplementary material for: Less (Transfusion) Is More—Enhancing Recovery through Implementation of Patient Blood Management in Cardiac Surgery: A Retrospective, Single-Centre Study of 1174 Patients
Source: MDPI journal article supplement (doi:10.3390/jcdd10070266), 2023-06-22

## BLEEDING MANAGEMENT

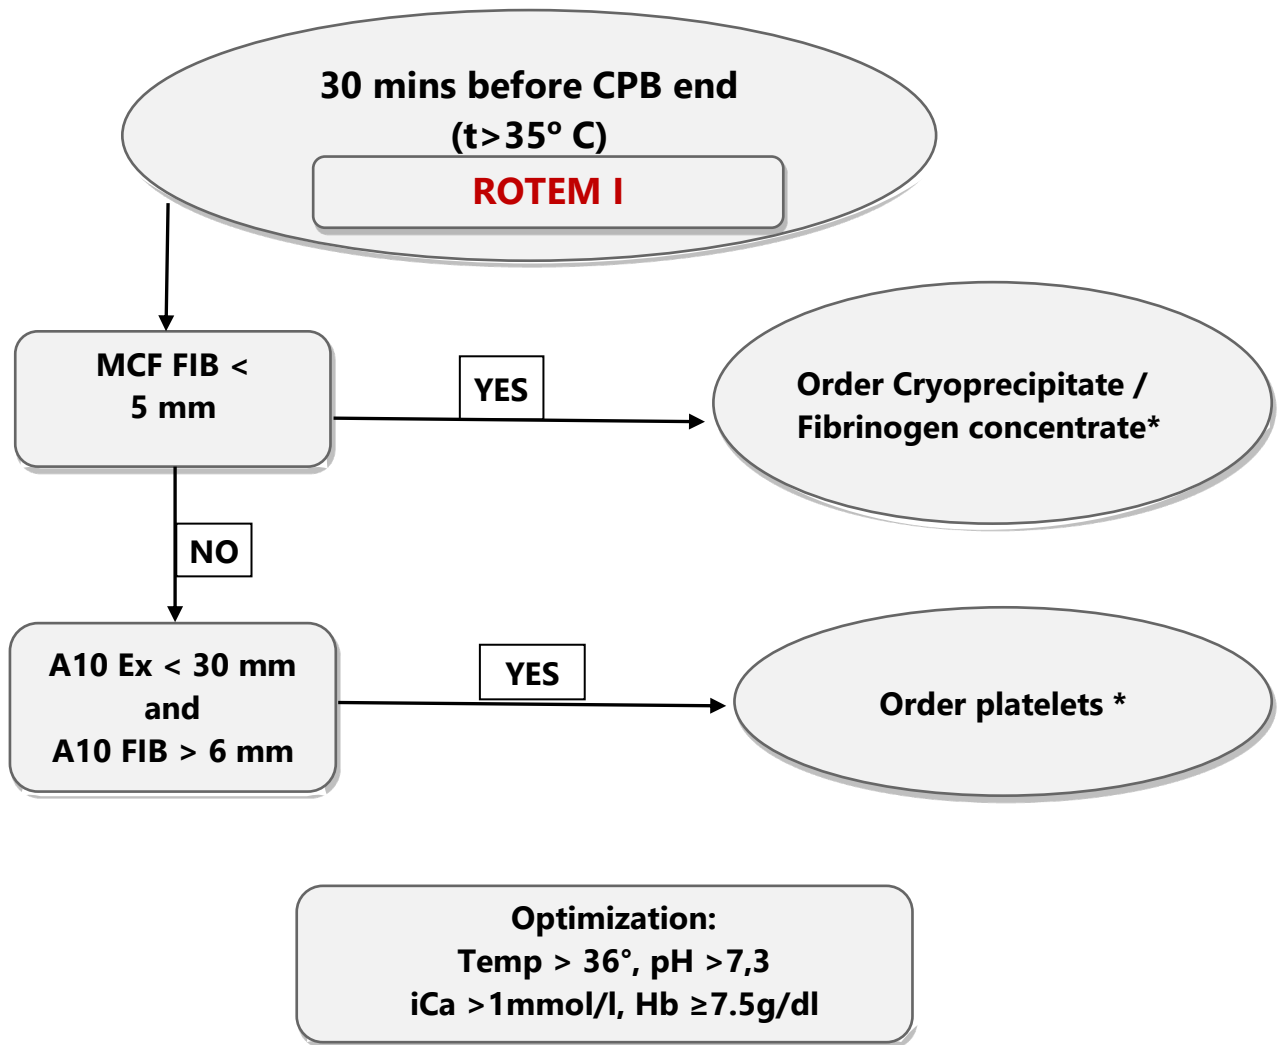

\*Can be administered with protamine if massive bleeding in acute aortic dissection surgery

**IF THE PATIENT IS NOT BLEEDING THE SECOND ROTEM IS NOT MANDATORY**

**ROTEM II**

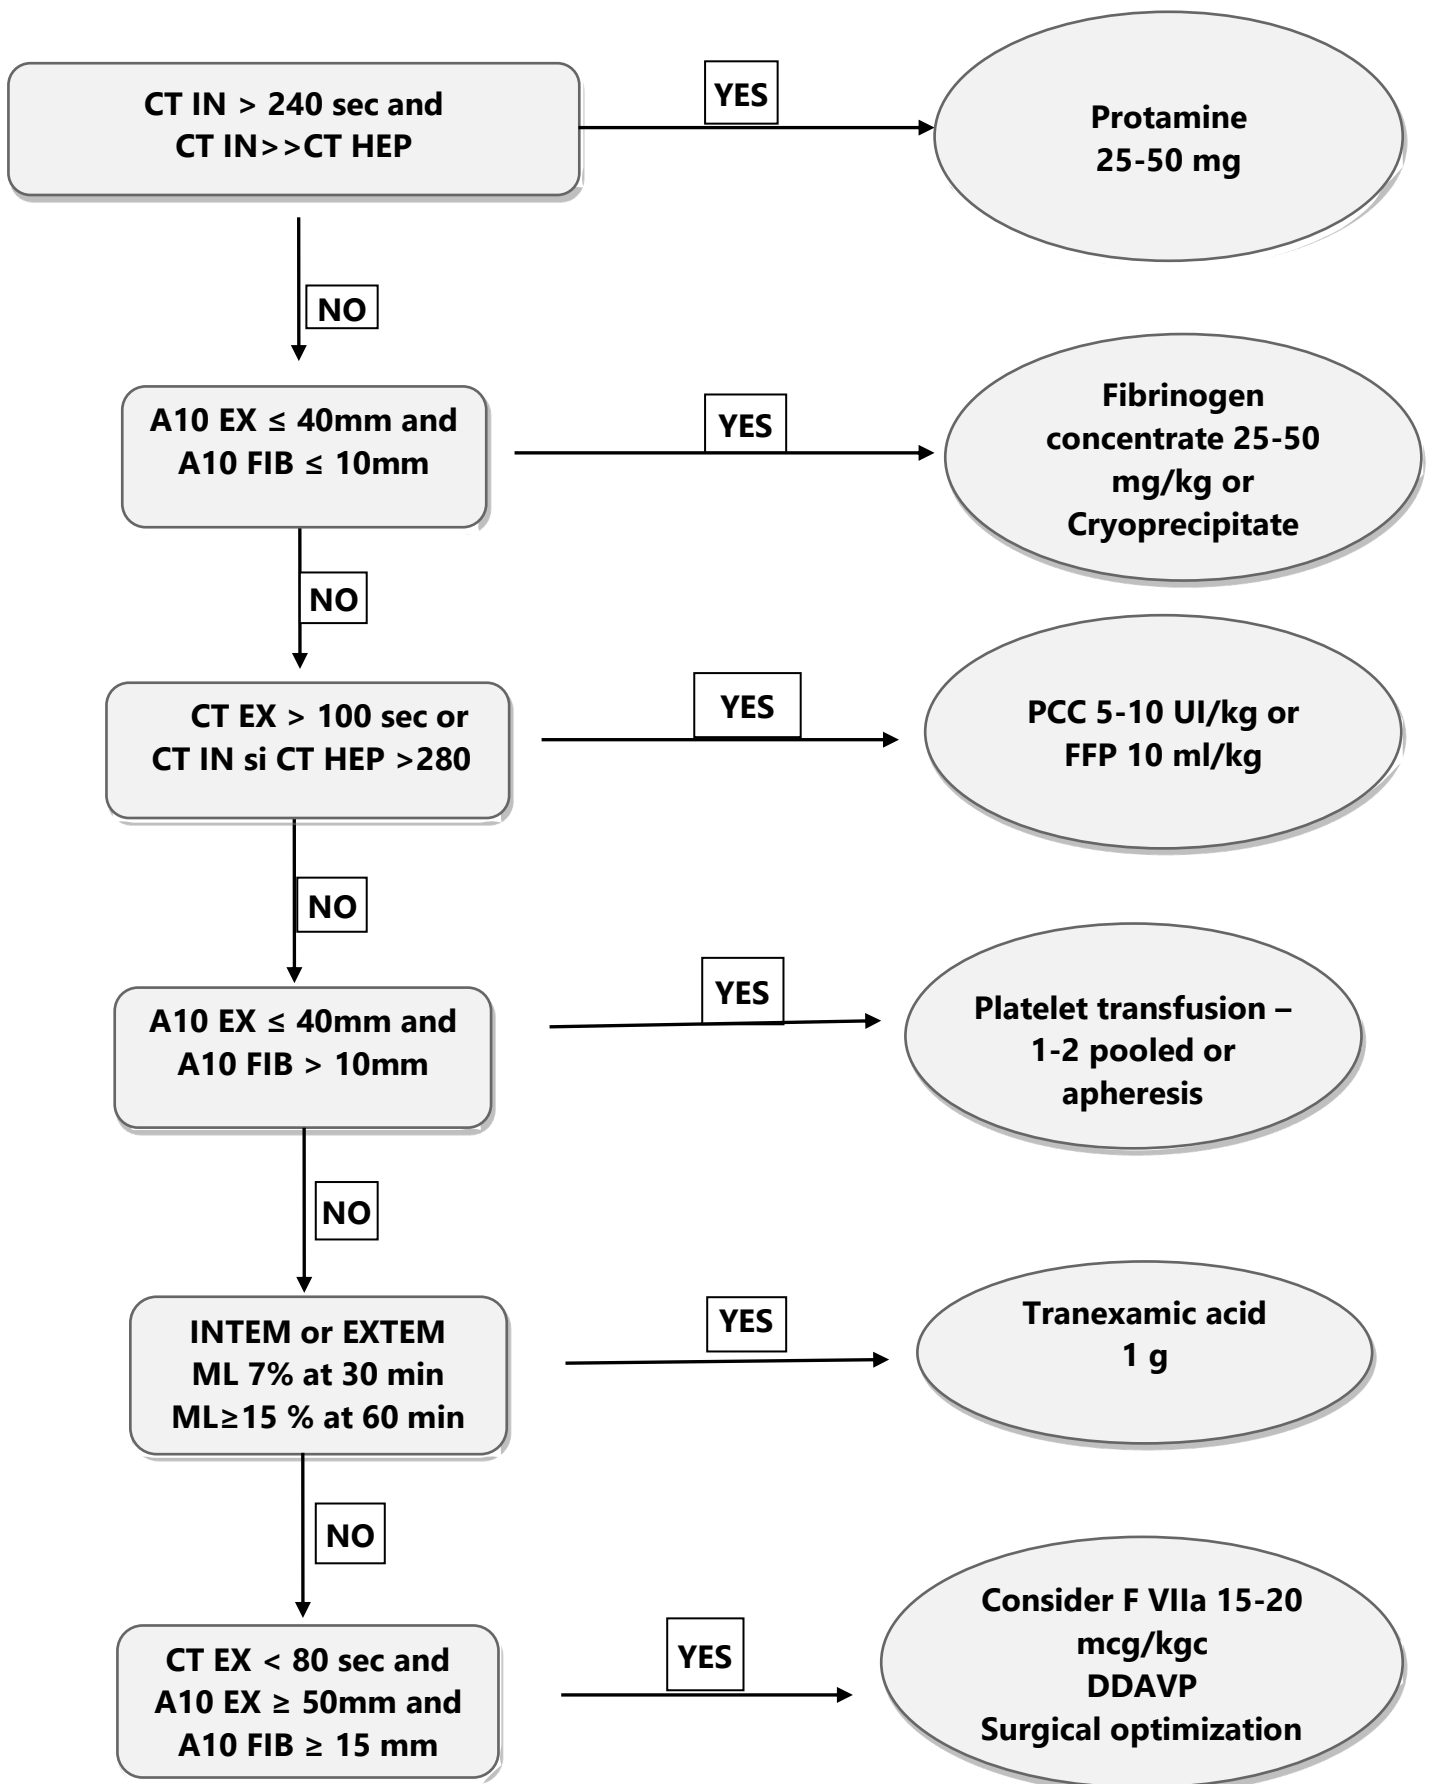

Supplement: s1 [file s1]
