# Supplementary material for: Less (Transfusion) Is More—Enhancing Recovery through Implementation of Patient Blood Management in Cardiac Surgery: A Retrospective, Single-Centre Study of 1174 Patients
Source: MDPI journal article supplement (doi:10.3390/jcdd10070266), 2023-06-22
Supplement: s1 [file s1]

## APPENDIX 5. Patient Blood Management Programme Monitoring and Evaluation Benchmarks

COC\*  Date admission of  Age  Gender (M/F)

Diagnosis:

- 1.
- 2.
- 3.

|                                                                |                      |                             |                      |                                                                    |                                      |                      |                                                                 |
|----------------------------------------------------------------|----------------------|-----------------------------|----------------------|--------------------------------------------------------------------|--------------------------------------|----------------------|-----------------------------------------------------------------|
| <b>Preoperative evaluation date:</b>                           |                      | <input type="text"/>        |                      | <b>Number of days between preoperative evaluation and surgery:</b> |                                      | <input type="text"/> |                                                                 |
| <b>Lab investigations – tests (as per Protocol algorithm):</b> |                      |                             |                      |                                                                    |                                      |                      | <b>(Absolute/<br/>Functional)<br/>Iron deficiency<br/>(Y/N)</b> |
| Hb (g/dL)                                                      | <input type="text"/> | TSAT (%)                    | <input type="text"/> | Serum ferritin (ng/mL)                                             | <input type="text"/>                 | CRP (mg/L)           | <input type="text"/>                                            |
| <b>Iron deficiency treatment:</b>                              |                      |                             |                      |                                                                    |                                      |                      |                                                                 |
| IV iron administration (Y/N)                                   | <input type="text"/> | IV iron dose (mg)           | <input type="text"/> | ESA** administration (Y/N)                                         | <input type="text"/>                 | ESA dose             | <input type="text"/>                                            |
| Days before surgery of iron administration                     | <input type="text"/> | Rescue erythropoiesis (Y/N) | <input type="text"/> | <input type="text"/>                                               | <input type="text"/>                 | <input type="text"/> | <input type="text"/>                                            |
| <b>Haemostasis:</b>                                            |                      |                             |                      |                                                                    |                                      | <input type="text"/> |                                                                 |
| Positive answer to haemostasis questionnaire (Y/N):            |                      |                             |                      | <input type="text"/>                                               | Haemostasis disorder detected (Y/N): |                      |                                                                 |
| Adjustment of antiplatelet drug therapy (Y/N):                 |                      |                             |                      | <input type="text"/>                                               |                                      |                      |                                                                 |
| Point of care haemostasis tests (Y/N):                         |                      | <input type="text"/>        | Haemostatic drugs:   |                                                                    |                                      | <input type="text"/> |                                                                 |

Surgery:

|                 |  |  |
|-----------------|--|--|
| Type of surgery |  |  |
| Date of surgery |  |  |

|                                    |  |                               |  |                         |  |
|------------------------------------|--|-------------------------------|--|-------------------------|--|
| Length of stay in hospital (days): |  | Length of stay in ICU (days): |  | In-hospital death (Y/N) |  |
|------------------------------------|--|-------------------------------|--|-------------------------|--|

|                                   |  |               |  |                |  |
|-----------------------------------|--|---------------|--|----------------|--|
| Haemoglobin (Hb, g/dL):           |  |               |  |                |  |
| At first preoperative evaluation: |  | Preoperative: |  | Postoperative: |  |
| At discharge                      |  |               |  |                |  |

|                                                   |  |                                                                                    |  |                                     |  |
|---------------------------------------------------|--|------------------------------------------------------------------------------------|--|-------------------------------------|--|
| Blood loss minimisation:                          |  |                                                                                    |  |                                     |  |
| Use of micro tubes for specimen collection (Y/N): |  | Use of closed flush systems for arterial lines and central venous catheters (Y/N): |  | Use of blood salvage systems (Y/N): |  |

|                                                     |  |                                                                    |  |
|-----------------------------------------------------|--|--------------------------------------------------------------------|--|
| Acute haemorrhage (Y/N):                            |  | Use of the multidisciplinary protocol for acute haemorrhage (Y/N): |  |
| Optimisation of the patient's tolerance of anaemia: |  |                                                                    |  |
| Use of advanced haemodynamic monitoring (Y/N):      |  |                                                                    |  |
| Use of hyperoxia (Y/N):                             |  | Monitoring of anaesthetic depth or neuromuscular block (Y/N):      |  |

|                                                    |               |  |                 |  |                |  |
|----------------------------------------------------|---------------|--|-----------------|--|----------------|--|
| Transfusions (number of units for each component): |               |  |                 |  |                |  |
| Packed red blood cells                             | Preoperative: |  | Intraoperative: |  | Postoperative: |  |
| Platelet concentrate                               | Preoperative: |  | Intraoperative: |  | Postoperative: |  |
| Fresh frozen plasma                                | Preoperative: |  | Intraoperative: |  | Postoperative: |  |
| Other blood component:<br>_____                    | Preoperative: |  | Intraoperative: |  | Postoperative: |  |

|                                                  |  |
|--------------------------------------------------|--|
| Indication code for transfusion (see Appendix 4) |  |
|--------------------------------------------------|--|

| Postoperative complications                                                     | YES | NO |          |
|---------------------------------------------------------------------------------|-----|----|----------|
| General postoperative complications - during hospital stay (Y/N), see Glossary: |     |    | Comments |
| Acute kidney injury                                                             |     |    | Stage:   |
| Major adverse cardiac events (MACE)                                             |     |    |          |
| Myocardial infarction                                                           |     |    |          |
| Pulmonary embolism                                                              |     |    |          |
| Pneumonia                                                                       |     |    |          |
| Postoperative haemorrhage                                                       |     |    |          |
| Stroke                                                                          |     |    |          |
| Surgical site infection (deep)                                                  |     |    |          |
| Surgical site infection (superficial)                                           |     |    |          |
| Other complications (based on the type of surgery):                             | YES | NO | Comments |
| -<br>-                                                                          |     |    |          |
| Transfusion-related complications                                               |     |    |          |
