# Supplementary material for: Less (Transfusion) Is More—Enhancing Recovery through Implementation of Patient Blood Management in Cardiac Surgery: A Retrospective, Single-Centre Study of 1174 Patients
Source: MDPI journal article supplement (doi:10.3390/jcdd10070266), 2023-06-22
Supplement: s1 [file s1]

**Supplementary figure 1 - Standardized pre-operative haemostasis questionnaire**

| Please tick or fill in the answer (Yes or No):                                                                                                       |                                                                                                                      | No | Yes | Validation |
|------------------------------------------------------------------------------------------------------------------------------------------------------|----------------------------------------------------------------------------------------------------------------------|----|-----|------------|
| Have you ever been diagnosed with a kidney, liver or bone marrow disease?                                                                            |                                                                                                                      |    |     |            |
| Have you ever noticed any of the following types of bleeds, sometimes without an apparent cause?                                                     |                                                                                                                      |    |     |            |
| a)                                                                                                                                                   | Nosebleeds (without other causes like prolonged sneezing, dry air, blowing your nose too hard, etc.)                 |    |     |            |
| b)                                                                                                                                                   | Large bruises or bleeding spots (also on the trunk, occurring even in the absence of trauma/hits); provide diameter. |    |     |            |
| c)                                                                                                                                                   | Bleeding joints, soft tissue or muscles                                                                              |    |     |            |
| Have you ever had prolonged bleeding in case of cuts or scratches?                                                                                   |                                                                                                                      |    |     |            |
| Do you remember having massive or prolonged bleeding after tooth extractions?                                                                        |                                                                                                                      |    |     |            |
| Do you remember having prolonged bleeding during or after surgery?                                                                                   |                                                                                                                      |    |     |            |
| Do your wounds take a lot of time to heal?                                                                                                           |                                                                                                                      |    |     |            |
| Have you ever had cases of haemophilia or bleeding disorders in your family?                                                                         |                                                                                                                      |    |     |            |
| Do you take or have you taken blood thinners lately? (e.g. Sintrom, Trombostop, Pradaxa, Eliquis, Xarelto, Aspenter, Plavix, Brilique, Efient, etc.) |                                                                                                                      |    |     |            |
| Are you currently on pain killers or anti-rheumatics, even over-the-counter ones? (e.g. Aspirin, Voltaren, Ibuprofen, etc.)                          |                                                                                                                      |    |     |            |
| Have you ever had an abnormal coagulation test or anaemia?                                                                                           |                                                                                                                      |    |     |            |
| <b>Additional questions for women:</b>                                                                                                               |                                                                                                                      |    |     |            |
| Do you have a long (>7 days) and/or heavier (frequent tampon/pad change) period?                                                                     |                                                                                                                      |    |     |            |
| Have you had massive bleeding after childbirth or during your period?                                                                                |                                                                                                                      |    |     |            |
