# Supplementary material for: Less (Transfusion) Is More—Enhancing Recovery through Implementation of Patient Blood Management in Cardiac Surgery: A Retrospective, Single-Centre Study of 1174 Patients
Source: MDPI journal article supplement (doi:10.3390/jcdd10070266), 2023-06-22
Supplement: s1 [file s1]

## Supplementary figure 2 – standardized pre-transfusion checklist

### Hb <6g/dL

- a. ☐ Irrespective of compensatory capacity

### Hb 6-8g/dL

- a. ☐ Indicators of anaemic hypoxia (tachycardia, hypotension, ischemia on ECG, lactic acidosis)
- b. ☐ Reduced compensatory capacity, presence of risk factors (coronary disease, heart failure, cerebrovascular diseases)
- c. ☐ Other indications.....

### Hb 8-10g/dL

- a. ☐ Indicators of anaemic hypoxia (tachycardia, hypotension, ECG ischemia, lactic acidosis)
- b. ☐ Other indications .....

### Hb >10 g/dL

- a. ☐ Other indications .....
